# Supplementary material for: Novel pyrazolylphosphite– and pyrazolylphosphinite–ruthenium(ii) complexes as catalysts for hydrogenation of acetophenone
Source: Royal Society of Chemistry journal article supplement (doi:10.1039/c6dt02164f), 2016-01-01
Supplement: c6dt02164f1.pdf [file c6dt02164f1.pdf]

## Supporting Information

### **Novel pyrazolylphosphite- and pyrazolylphosphinite-ruthenium(II) complexes as catalysts for hydrogenation of acetophenone**

Gershon Amenuvor,<sup>a</sup> Collins Obuah,<sup>a</sup> Ebbe Nordlander,<sup>b</sup> and James Darkwa<sup>\*a</sup>

*<sup>a</sup>Department of Chemistry, University of Johannesburg, PO Box 524, Auckland Park, 2006,  
South Africa.*

*<sup>b</sup>Inorganic Chemistry Research Group, Chemical Physics, Centre for Chemistry and Chemical  
Engineering, Lund University, Box 124, SE-221 00 Lund, Sweden*

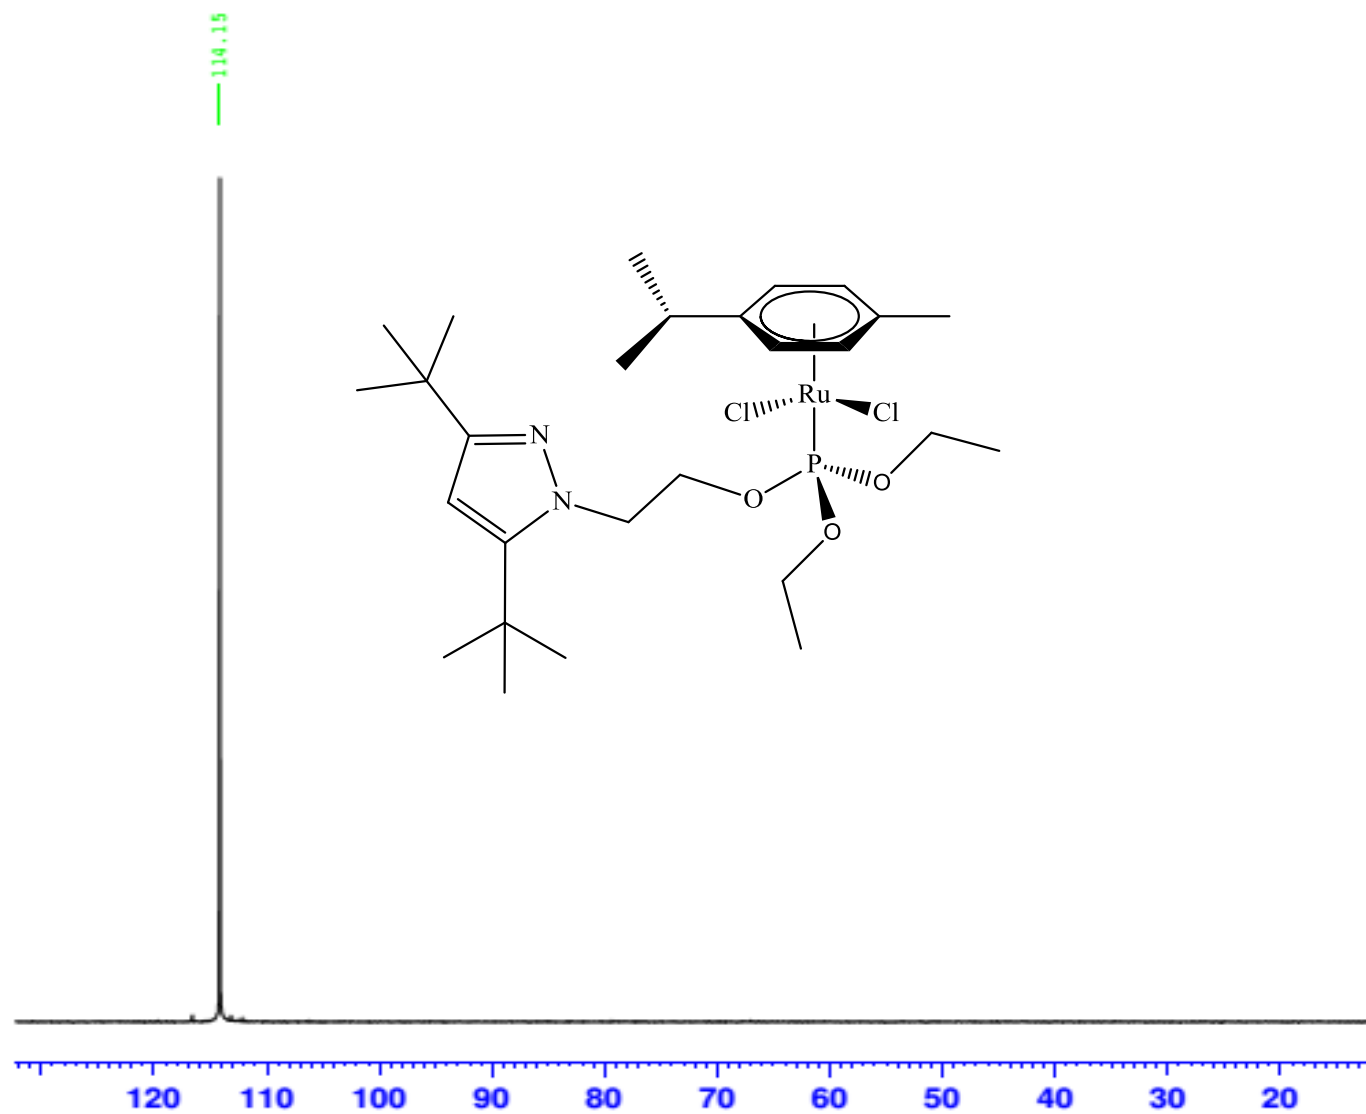

**Figure S1:**  $^{31}\text{P}\{^1\text{H}\}$  NMR spectrum of **3**. Analysis was carried out in  $\text{CDCl}_3$  at room temperature.

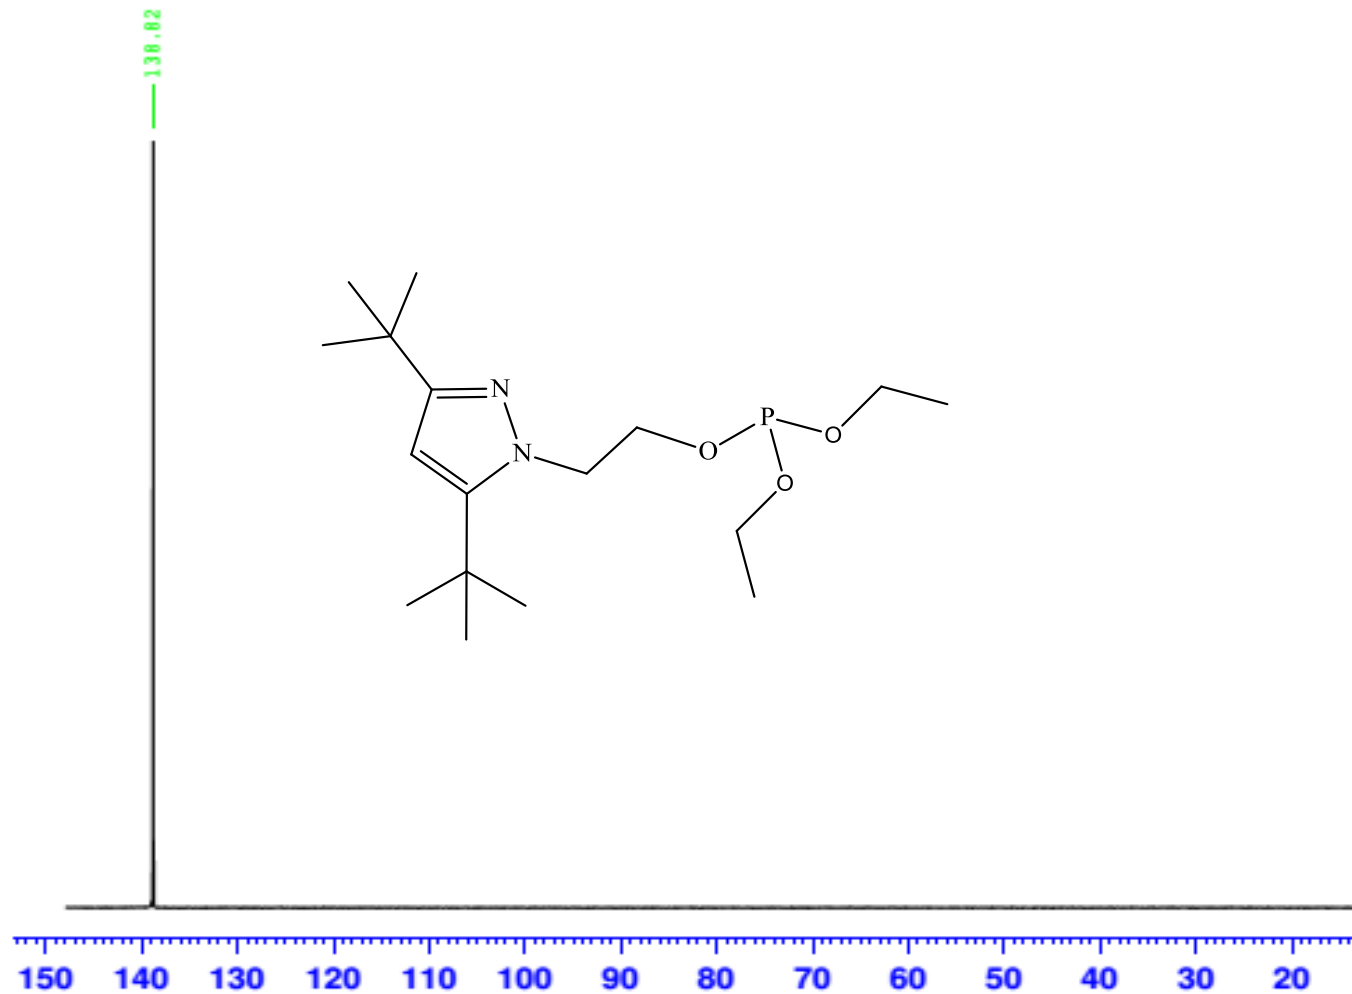

**Figure S2:**  $^{31}\text{P}\{^1\text{H}\}$  NMR spectrum of **L3**. Analysis was carried out in  $\text{CDCl}_3$  at room temperature.

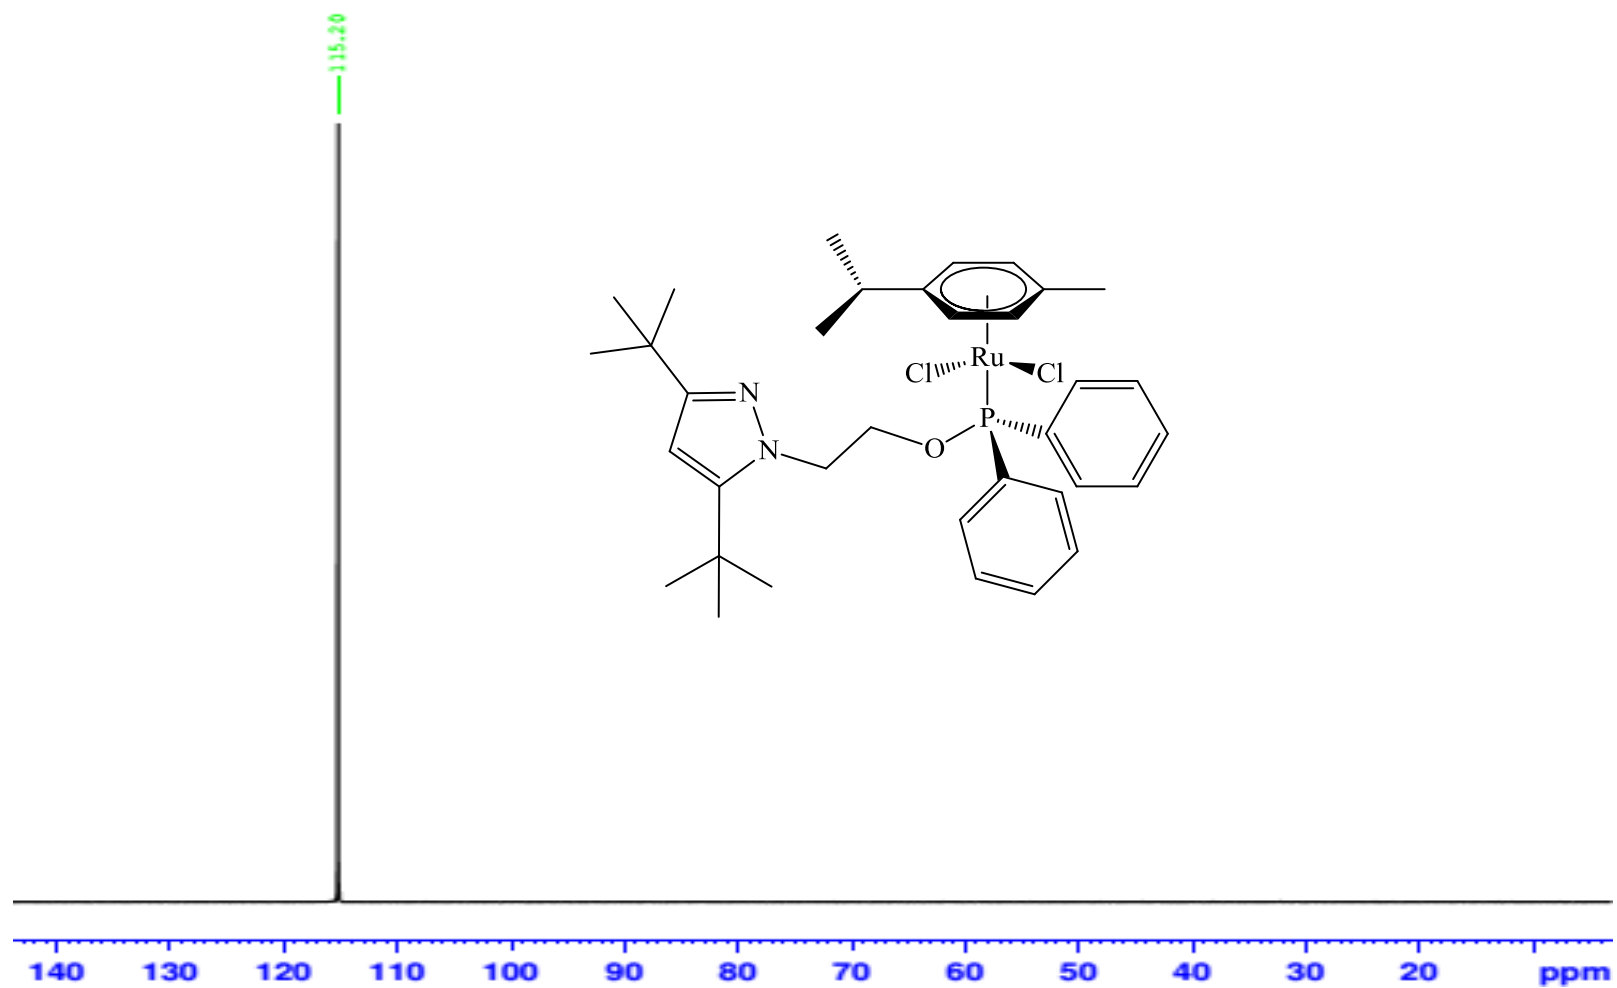

**Figure S3:**  $^{31}\text{P}\{^1\text{H}\}$  NMR spectrum of **1**. Analysis was carried out in  $\text{CDCl}_3$  at room temperature.

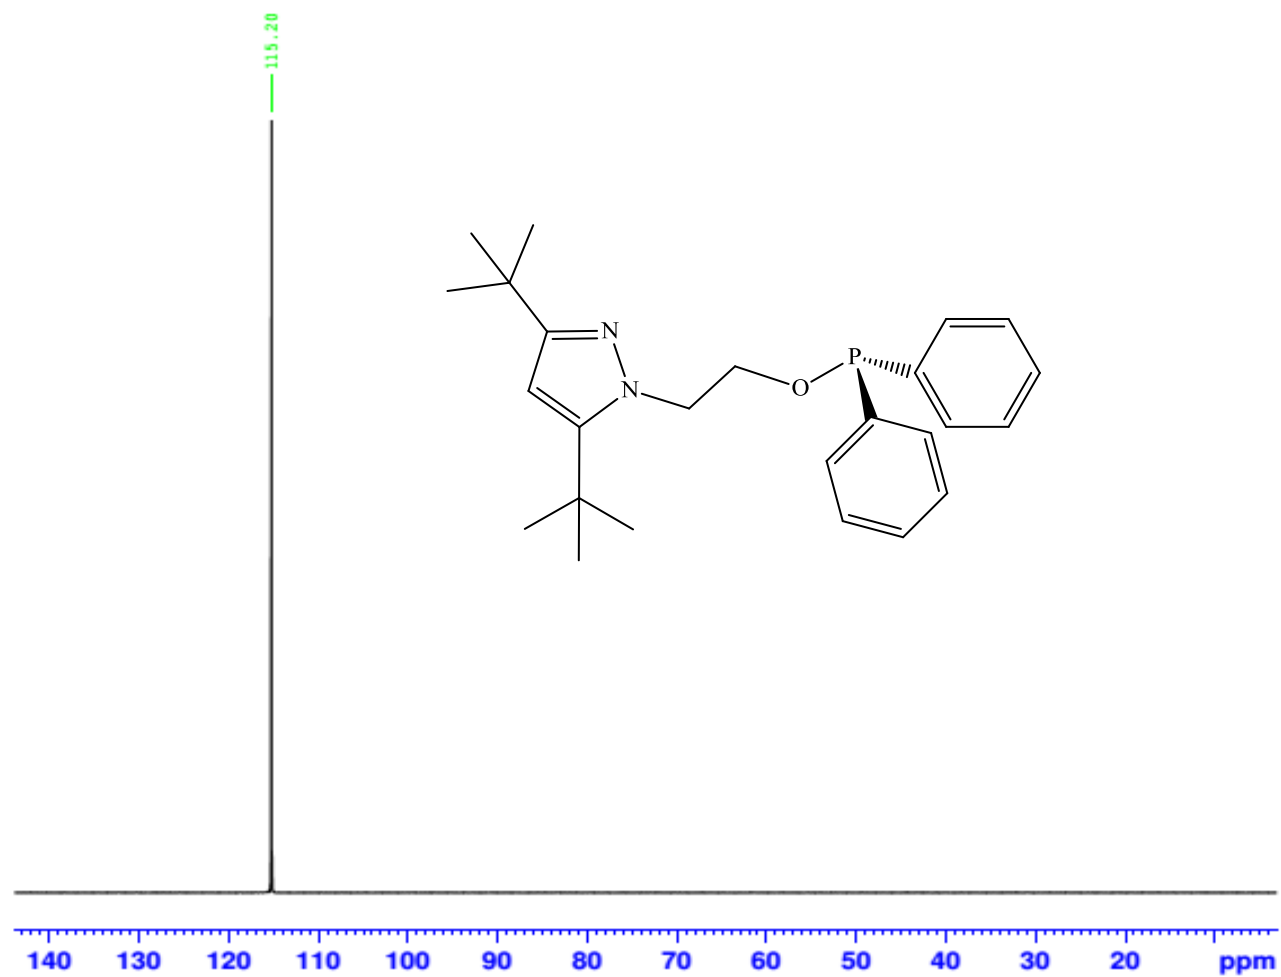

**Figure S4:**  $^{31}\text{P}\{^1\text{H}\}$  NMR spectrum of **L1**. Analysis was carried out in  $\text{CDCl}_3$  at room temperature.

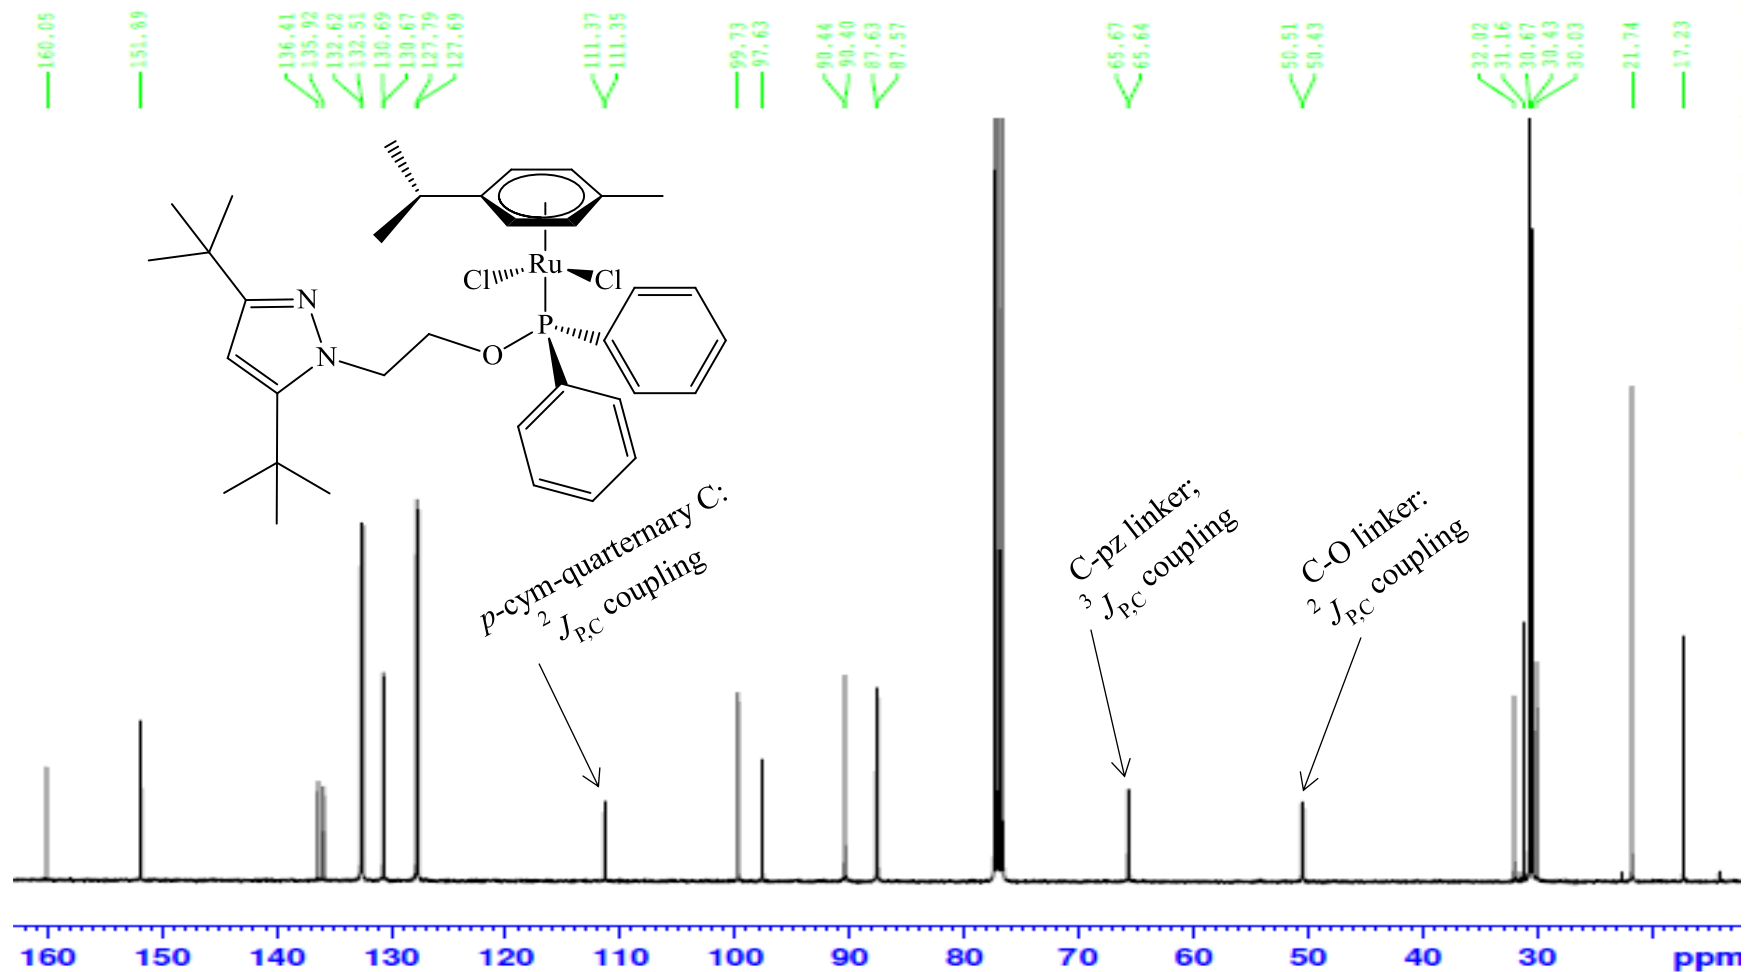

**Figure S5:**  $^{13}\text{C}\{^1\text{H}\}$  NMR spectrum of **1**. Analysis was carried out in  $\text{CDCl}_3$  at room temperature.

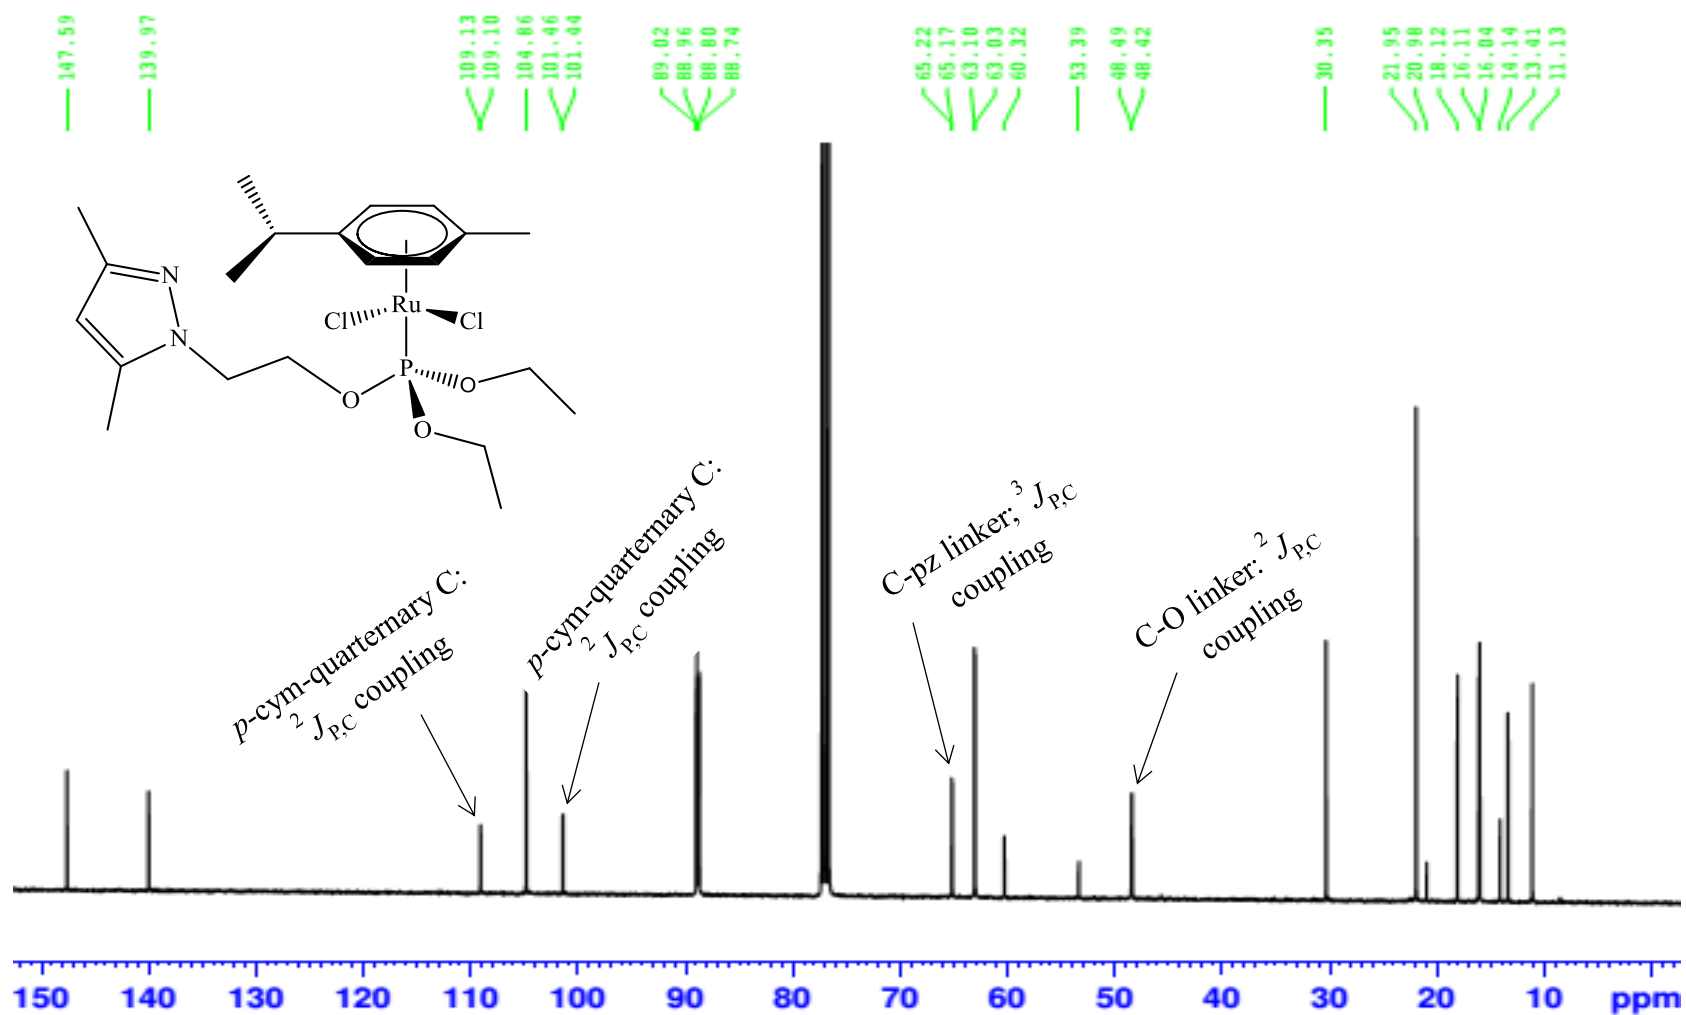

**Figure S6:**  $^{13}\text{C}\{^1\text{H}\}$  NMR spectrum of **2**. Analysis was carried out in  $\text{CDCl}_3$  at room temperature.

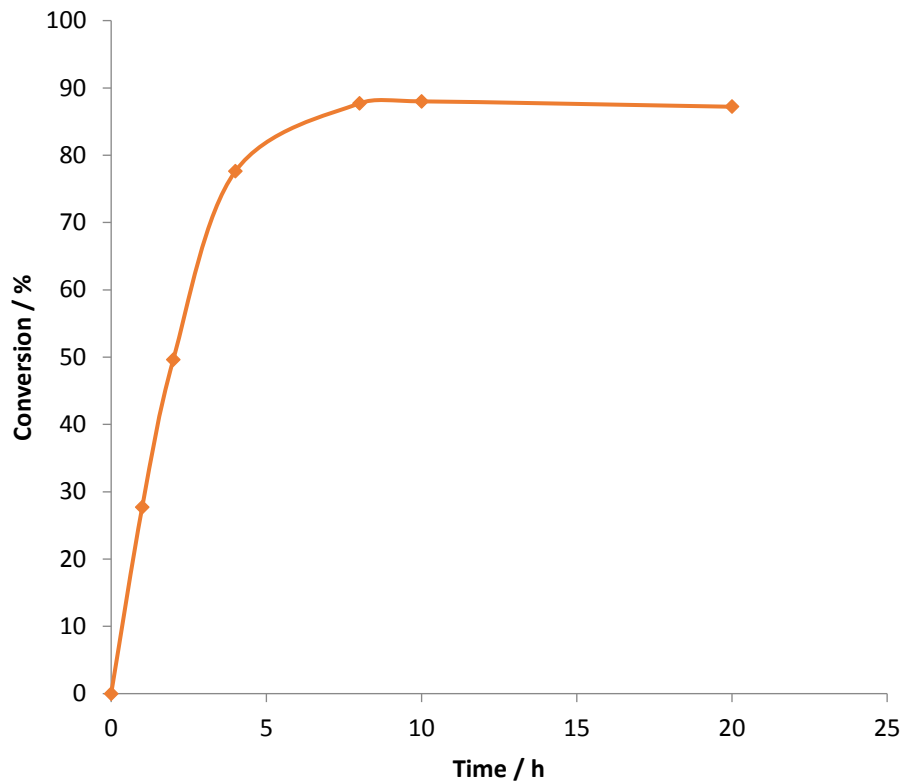

Conditions: acetophenone = 2 mmol, ruthenium(II) catalyst = 0.02 mmol, (1 mol%) KOH = 1 mmol, 2-propanol (10 mL), 80 °C. Conversions were determined by GC.

**Figure S7:** %Conversion vs time for transfer hydrogenation of acetophenone to 1-phenylethanol using complex **6** as catalyst.



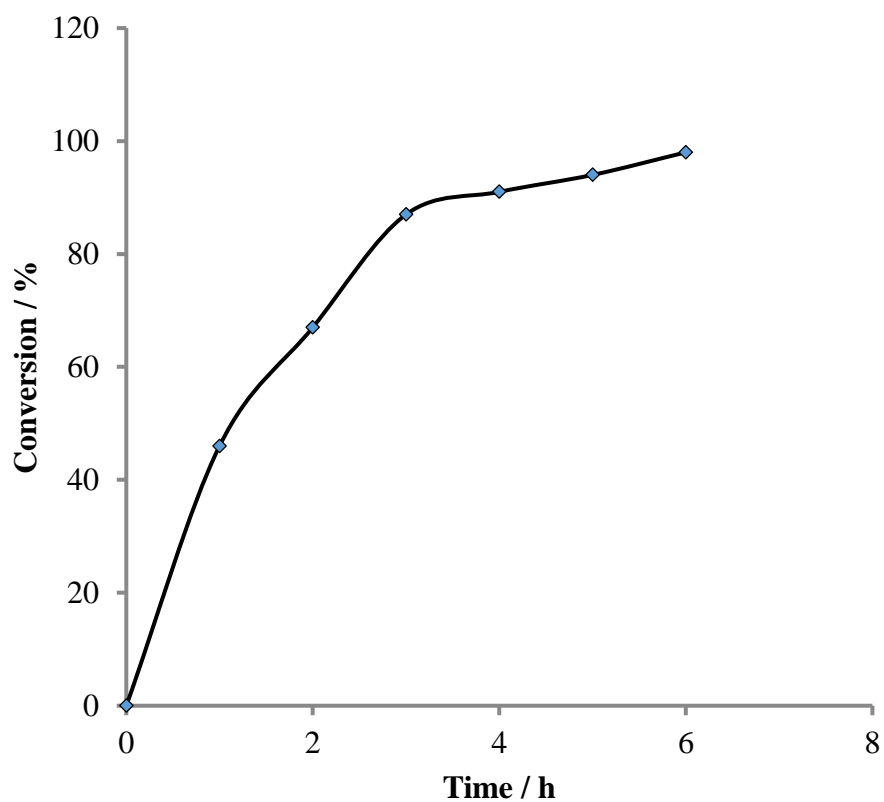

Conditions: acetophenone = 2 mmol, catalyst = 0.02 mmol (1 mol%),  $\text{H}_2$  = 20 bar, KOH = 1 mmol, 70 °C, 6 h, ethanol = 5 mL

**Figure S8:** Time study of molecular hydrogenation of acetophenone to 1-phenylethanol using complex **3**.

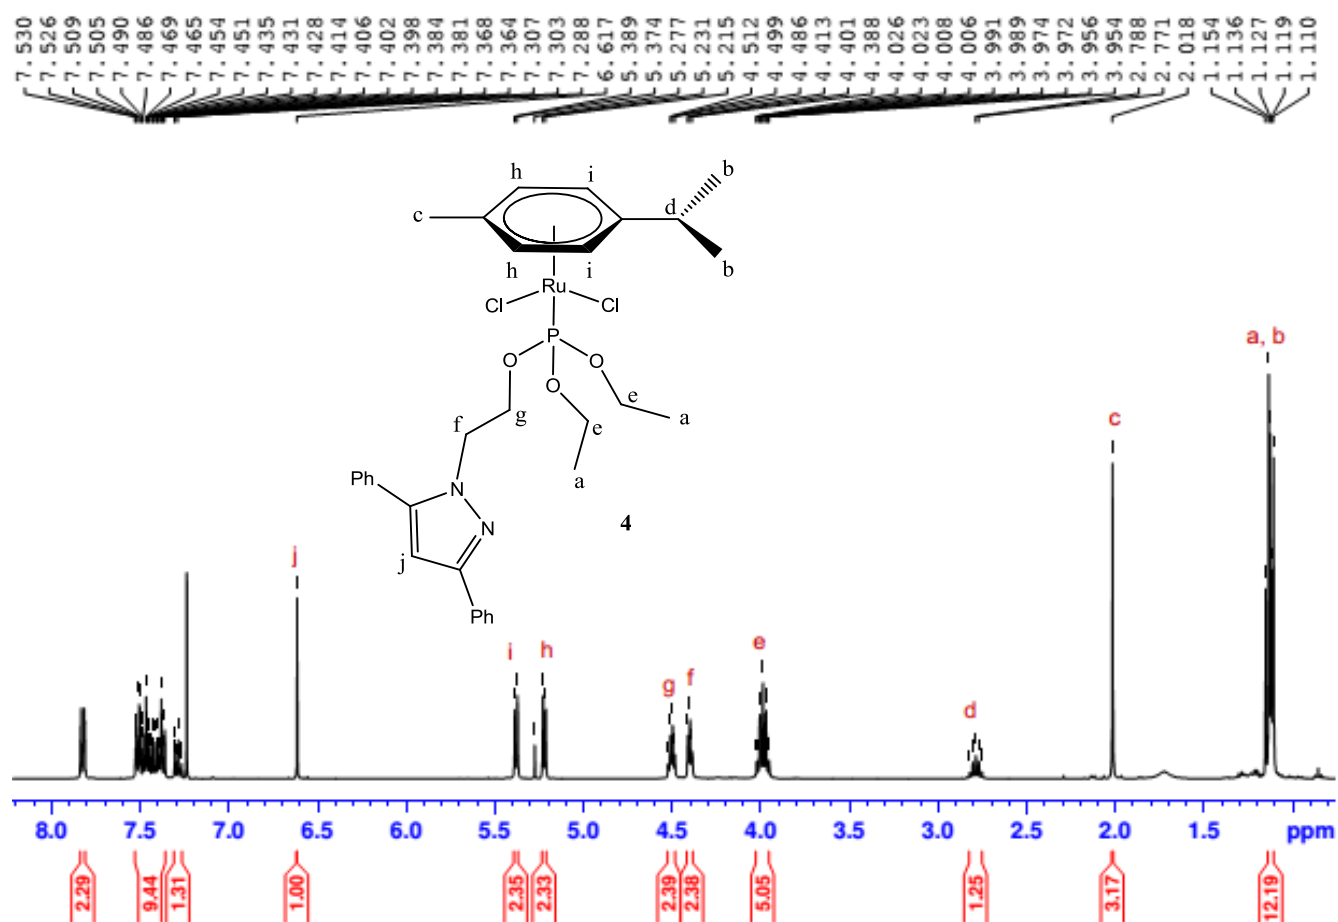

**Figure S9a:** <sup>1</sup>H NMR spectrum of **4**. Analysis was carried out in CDCl<sub>3</sub> at room temperature.

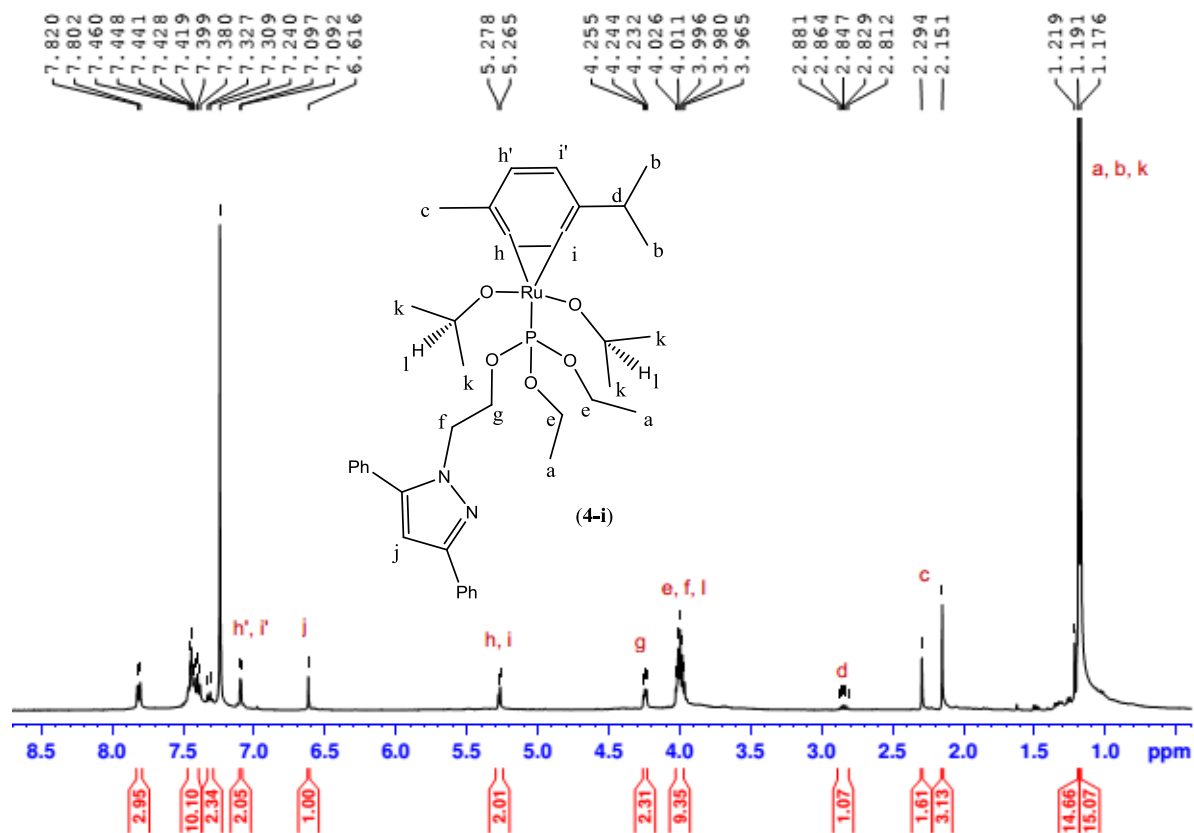

**Figure S9b:**  $^1\text{H}$  NMR spectrum of (4-i). Analysis was carried out in  $\text{CDCl}_3$  at room temperature. (4-i) was isolated from a reaction mixture of 2-propanol, **4** and KOH.
